1 **Trends in antimicrobial resistance amongst *Salmonella* Typhi in Bangladesh: a 24-year**  
2 **retrospective observational study (1999–2022)**

3 Arif M Tanmoy,<sup>1,2</sup> Yogesh Hooda,<sup>1</sup> Mohammad S I Sajib,<sup>1</sup> Hafizur Rahman,<sup>1</sup> Anik Sarkar,<sup>1</sup>  
4 Dipu Das,<sup>1</sup> Nazrul Islam,<sup>1</sup> Naito Kanon,<sup>1</sup> Md. Asadur Rahman,<sup>3</sup> Denise O Garrett,<sup>4</sup> Hubert P  
5 Endtz,<sup>2</sup> Stephen P Luby,<sup>5</sup> Mohammod Shahidullah,<sup>6</sup> Md. Ruhul Amin,<sup>7</sup> Jahangir Alam,<sup>7</sup>  
6 Mohammed Hanif,<sup>7</sup> Samir K Saha,<sup>1,8</sup> and Senjuti Saha.<sup>1,\*</sup>

7

8 <sup>1</sup>Child Health Research Foundation, Dhaka, Bangladesh.

9 <sup>2</sup>Department of Medical Microbiology and Infectious Diseases, Erasmus MC, Rotterdam, the  
10 Netherlands.

11 <sup>3</sup>Popular Diagnostic Center, Dhaka, Bangladesh.

12 <sup>4</sup>Sabin Vaccine Institute, Washington, DC, USA.

13 <sup>5</sup>Division of Infectious Diseases and Geographic Medicine, Stanford University School of  
14 Medicine, Stanford, California, USA.

15 <sup>6</sup>Department of Neonatology, Bangabandhu Sheikh Mujib Medical University, Dhaka,  
16 Bangladesh.

17 <sup>7</sup>Department of Pediatrics, Bangladesh Institute of Child Health, Dhaka, Bangladesh.

18 <sup>8</sup>Department of Microbiology, Bangladesh Shishu Hospital and Institute, Dhaka, Bangladesh.

19

20 Short running title: *Salmonella* Typhi AMR Trends in Bangladesh (1999–2022).

21

22 \**Corresponding author:* Senjuti Saha, PhD; Child Health Research Foundation, Dhaka,

23 Bangladesh. Email: [senjutisaha@chrfbd.org](mailto:senjutisaha@chrfbd.org)

24

## 25 **Abstract**

26 **Background.** Rising antimicrobial resistance (AMR) in *Salmonella* Typhi restricts typhoid  
27 treatment options, heightening concerns for pan-oral drug-resistant outbreaks. Bangladesh  
28 contemplates introducing typhoid conjugate vaccine (TCV) to address the typhoid burden and  
29 AMR. However, large-scale surveillance data on typhoid AMR in Bangladesh is scarce.

30 **Objective.** This study explores the AMR trends in *Salmonella* Typhi isolates from Bangladesh,  
31 drawing comparisons with antibiotic consumption to optimize antibiotic stewardship strategies  
32 for the country.

33 **Methods.** Our typhoid fever surveillance included two pediatric hospitals and three private  
34 clinics in Dhaka, Bangladesh, spanning 1999 to 2022. Blood cultures were performed at  
35 physicians' discretion; cases were confirmed by microbiological culture, serological, and  
36 biochemical tests. Antimicrobial susceptibility was determined following CLSI guidelines.  
37 National antibiotic consumption data for cotrimoxazole, ciprofloxacin, and azithromycin was  
38 obtained from IQVIA-MIDAS database for comparison.

39 **Results.** Our 24-year surveillance, encompassing 12,435 *Salmonella* Typhi cases, revealed  
40 declining trends in first-line drugs (amoxicillin, chloramphenicol, cotrimoxazole) and multidrug  
41 resistance (MDR; 38% to 17%, 1999–2022). Cotrimoxazole consumption dropped, 0.8 to 0.1  
42 DDD/1000/day (1999–2020). Ciprofloxacin non-susceptibility persisted (>90%) with unchanged  
43 consumption (1.1-1.3 DDD/1000/day, 2002–2020). Low ceftriaxone resistance (<1%) was  
44 observed, with rising MIC (0.03 to 0.12 mg/L, 1999–2019). Azithromycin consumption  
45 increased (0.1 to 3.8 DDD/1000/day, 1999–2020), but resistance remained  $\leq$ 4%.

46 **Conclusion.** Our study highlights declining MDR amongst *Salmonella* Typhi in Bangladesh,  
47 thus reintroducing first-line antimicrobials could work as an empirical treatment option for  
48 typhoid fever. Our analysis provides a baseline for monitoring the impact of future interventions,  
49 including the TCV, on typhoid burden and associated AMR.

50

## 51 **Introduction**

52 Antimicrobial resistance (AMR) poses a significant threat to public health, estimated to cause  
53 approximately 1.27 million deaths in 2019.<sup>1</sup> If unchecked, deaths linked to AMR infections  
54 could multiply 10-fold by 2050 due to widespread antimicrobial use and a paucity of new  
55 antimicrobials.<sup>2,3</sup> In response to this threat, multiple strategies have been proposed, ranging from  
56 antibiotic stewardship to alternative antibiotic therapies. Implementing these interventions  
57 requires guidance from surveillance data, but many low- and middle-income countries (LMICs)  
58 face substantial data deficits.<sup>1</sup> This study aims to provide insights into AMR trends in  
59 Bangladesh for *Salmonella enterica* serovar Typhi (Salmonella Typhi), the etiological agent of  
60 typhoid fever, over a 24-year period, from 1999 to 2022.

61

62 Typhoid fever is a pressing global public health concern, with the majority of cases occurring in  
63 South Asia.<sup>4</sup> In Bangladesh, the typhoid burden is alarmingly high, especially in the capital city  
64 of Dhaka, where the estimated incidence is 913 per 100,000 person-years.<sup>5</sup> While the disease is  
65 more prevalent among school-age children,<sup>6</sup> those under 2 years old experience the highest  
66 bacterial load.<sup>7</sup> Clinical and epidemiological data on typhoid fever have been traditionally  
67 reported from hospital-based surveillance studies, but, in many endemic countries, like  
68 Bangladesh, a significant number of typhoid patients seek care at community-based diagnostic  
69 centers or, hospital outpatient departments (OPD).<sup>8-11</sup> This diverse care-seeking behavior  
70 complicates the precise estimation of the disease burden and AMR trends for typhoid fever.

71

72 Management of typhoid fever is becoming increasingly difficult with rising AMR. Multi-drug  
73 resistant (MDR, defined as the concurrent resistance to amoxicillin, chloramphenicol, and co-  
74 trimoxazole) *Salmonella* Typhi isolates emerged in the 1970s.<sup>12, 13</sup> This led to ciprofloxacin as  
75 the primary treatment choice by mid-1980s, but resistance followed. By mid-2010s, over 90% of  
76 *Salmonella* Typhi in South Asia showed non-susceptibility to ciprofloxacin.<sup>14</sup> The current  
77 treatments include azithromycin and third-generation cephalosporins such as ceftriaxone,<sup>13</sup> but,  
78 reports of resistance to both drugs are increasing.<sup>15-20</sup> The 2016 typhoid outbreak in Pakistan,  
79 caused by an extensively drug resistant (XDR; resistant to ceftriaxone, ciprofloxacin and first-  
80 line of antimicrobials) lineage,<sup>19</sup> sparked global concern. Additionally, a novel *acrB*-717 gene  
81 mutation linked to azithromycin resistance,<sup>16</sup> has narrowed treatment options and raised fears of  
82 a pan-oral drug-resistant (PoDR) outbreak. A recent pan-oral resistant typhoid case has been  
83 reported from Pakistan and required intravenous carbapenem and colistin treatment.<sup>21</sup> This  
84 highlights the looming threat of AMR and related financial burden on patients and healthcare  
85 systems which is struggling to cope with high typhoid prevalence in LMICs.<sup>13, 22</sup>

86  
87 To curb this high burden of typhoid fever, the Government of Bangladesh is considering the  
88 introduction of a typhoid conjugate vaccine (TCV). Phase-III trials have showed that the vaccine  
89 reduces typhoid fever by 81–85% and it has been introduced in Pakistan, Liberia, Zimbabwe,  
90 Samoa, and Nepal.<sup>23, 24</sup> However, the continuous monitoring of AMR trends in the post-  
91 vaccination era is essential to ensure sustained support from policymakers. This is especially  
92 crucial for Bangladesh, which is poised to shed its Least-Developed Countries (LDC) status in  
93 2026 and start losing financial support from Gavi for vaccines. Amidst many competing  
94 priorities, policymakers of Bangladesh will require robust surveillance data to make informed  
95 decisions about the TCV program. To this end, our study provides insights on the historical

96 trends in AMR through a comprehensive typhoid surveillance dataset of 12,489 *Salmonella*  
97 Typhi isolates, spanning 24 years (1999-2022). It elucidates correlations between AMR and  
98 antibiotic consumption, providing a baseline to guide the design of antibiotic stewardship  
99 policies. It also provides insights into designing empirical treatment strategies for typhoid fever  
100 management and potential strategies to combat increasing AMR in Bangladesh.

101

## 102 **Methods and Materials**

### 103 Enteric fever surveillance

104 The Child Health Research Foundation (CHRF) has been conducting enteric fever surveillance in  
105 Bangladesh since 1999, with a focus on the pediatric population (<18 years of age). This  
106 surveillance is carried out at three sites in Dhaka, the capital of Bangladesh with the highest  
107 burden of typhoid fever.<sup>6</sup> These sites are: (a) Bangladesh Shishu Hospital and Institute (BSHI), a  
108 650-bed hospital that is the largest pediatric hospital in the country, (b) Dr. M R Khan Shishu  
109 Hospital & Institute of Child Health (SSFH), a 250-bed hospital that is the second largest  
110 pediatric hospital in Dhaka, and (c) three branches of the Popular Diagnostic Center (PDC), a  
111 community-based consultation and diagnostic center. All cases were classified based on whether  
112 they were treated in the outpatient facility (OPD) or admitted to the hospitals (in-patient, IPD).  
113 All cases from PDC were classified as OPD. Blood samples were collected for microbiological  
114 culture as a part of the diagnostic service at the attending physicians' discretion. BSHI and SSFH  
115 are part of the Global Invasive Vaccine-Preventable Bacterial Disease Surveillance Network  
116 since 2009.<sup>25</sup> Details of all three sites and our enteric fever surveillance program have been  
117 described previously.<sup>8, 26</sup> All data used in this study are given in Supplementary Data S1.

118

119 Etiological confirmation and antimicrobial susceptibility testing

120 In all hospitals, routine blood cultures were performed using standard methods, as described  
121 earlier.<sup>8, 27</sup> *Salmonella* Typhi isolates from PDC were reconfirmed at BSHI using biochemical  
122 tests (Klingler's Iron agar, Simmons citrate agar, motility-indole, and urea agar tests) and  
123 *Salmonella* agglutinating antisera (Thermo Scientific, MA, USA). Antibiotic susceptibility tests  
124 were conducted for amoxicillin, cotrimoxazole, chloramphenicol, ciprofloxacin, ceftriaxone, and  
125 azithromycin using the Kirby-Bauer disc diffusion method (Oxoid, Thermo Scientific, MA,  
126 USA). The minimum inhibitory concentrations (MICs) for ceftriaxone and ciprofloxacin were  
127 determined for two subsets of isolates (from 1999–2019 and 1999–2016 respectively), using the  
128 broth microdilution method (Sigma-Aldrich, MO, USA).<sup>28, 29</sup> All isolates collected before 2017  
129 underwent MIC testing if recoverable on plates. Additionally, ceftriaxone MIC testing was  
130 performed on a random set of isolates from the later period (2017–2019). Zone-diameters (ZD)  
131 and MIC data were interpreted based on the guideline of Clinical and Laboratory Standards  
132 Institute (CLSI), 2020. Azithromycin-resistant (ZD: <11 mm) and near-resistant (ZD: 11-13 mm)  
133 isolates were reconfirmed using Etest strips (bioMérieux, Marcy-l'Étoile, France). The MIC<sub>50</sub> for  
134 ceftriaxone and ciprofloxacin, indicating the MIC value at which 50% of tested isolates could not  
135 grow, was also calculated. Ceftriaxone MIC of two isolates (MIC >256 mg/L) were excluded  
136 from all related analyses, to mitigate the impact of outliers.

137

138 Acquisition and analyses of antibiotic consumption data

139 To compare the patterns of typhoid cases, we acquired antibiotic consumption data (1999-2020)  
140 for co-trimoxazole, ciprofloxacin, and azithromycin from the IQVIA-Multinational Integrated



141 Data Analysis System (IQVIA-MIDAS®) database. This commercial database captures retail  
142 pharmacy sales, encompassing the total antibiotic volumes sold to both retailers and hospital  
143 pharmacies by wholesalers. It also records annual sales of each antimicrobial agent for each  
144 country. We excluded antimicrobial sales data for the agricultural sector. Daily defined doses  
145 (DDD) for these antimicrobials were gathered from ATC/DDD Index 2023  
146 ([https://www.whooc.no/atc\\_ddd\\_index/](https://www.whooc.no/atc_ddd_index/)). DDD represents the assumed average maintenance  
147 dose per day for its main indication in adults. Adjusting for population size, we calculated DDDs  
148 per 1000 inhabitants per day, following the WHO's Global Antimicrobial Resistance and Use  
149 Surveillance System (GLASS).<sup>30</sup> Annual population data for Bangladesh was collected from the  
150 United Nations-World Population Prospect Report 2019.<sup>31</sup>

151

## 152 Statistical analysis

153 We used Pearson's correlation coefficients to assess correlations between yearly AMR patterns  
154 and consumption of co-trimoxazole, ciprofloxacin, and azithromycin. All correlation tests were  
155 conducted in Stata v13.0. We also examined potential non-linear resistance patterns for  
156 ciprofloxacin and ceftriaxone using their MIC data, and for azithromycin with yearly resistance  
157 percentage data. The analyses for ciprofloxacin and ceftriaxone employed the generalized  
158 additive model (GAM) with the *mgcv* package in R (version R 4.2.3). The model formula was  $y$   
159  $\sim s(x, bs = "cs")$ , with 3,214 and 3,518 observations for ciprofloxacin and ceftriaxone,  
160 respectively. Yearly trend of azithromycin resistance was analyzed similarly in R (version R  
161 4.2.3) using local polynomial regression.

162

## 163 **Results**

### 164 Resistance to the first-line antimicrobials amoxicillin, chloramphenicol, cotrimoxazole

165 Our typhoid fever surveillance recorded 12,435 *Salmonella* Typhi cases from 1999 to 2022 (Data  
166 S1). Of these cases, 28% (3,478/12,435) required hospitalization (IPD) at either BSHI or SSFH  
167 hospital (Figure S1). During this period, we observed a declining trend in resistance among  
168 *Salmonella* Typhi isolates to the first-line antimicrobials—amoxicillin, chloramphenicol, and  
169 cotrimoxazole. In 2002, resistance peaked at 80%, but decreased to less than 20% in recent years  
170 for all three first-line antimicrobials (Figure 1a-c). This decline was also reflected in multidrug  
171 resistance (MDR), which was 17% in 2022 (Figure 1d). The percentage of MDR isolates  
172 remained  $\leq 26\%$  since 2010 (average 20%; 18%–23% at 95% Confidence Interval, CI) and  $\leq 19\%$   
173 since 2017 (average 17%; 15%–19% at 95% CI).

174

### 175 Resistance to ciprofloxacin, ceftriaxone, and azithromycin

176 Non-susceptibility to ciprofloxacin in *Salmonella* Typhi was notably high, reaching 95% in 2001  
177 from 56% in 1999, and remained above 90% throughout the study period. In 2022, 98%  
178 (1,266/1,298) of the isolates were non-susceptible to ciprofloxacin (Figure 2a). We further  
179 examined the non-susceptibility trend to ciprofloxacin using minimum inhibitory concentration  
180 (MIC) data (Figure 3a). Our analysis with the Generalized Additive Model (GAM) of the MIC  
181 data revealed a consistent trend with no significant changes in non-susceptibility to  
182 ciprofloxacin. The MIC trend for ciprofloxacin remained stable at approximately 0.25 mg/L  
183 throughout the entire study period (Figure 3a).

184

185 Ceftriaxone resistance, on the other hand, was rare among *Salmonella* Typhi isolates during our  
186 study period. Only two isolates were ceftriaxone-resistant, one in 1999 and the other in 2000,  
187 with no further instances recorded (Figure 2b). To gain detailed insights into this resistance  
188 trend, we generated ceftriaxone MIC data for a subset of isolates (n = 3,518) spanning from 1999  
189 to 2019. Our analysis showed a gradual increase in MIC values over time. Overall resistance to  
190 ceftriaxone rose from 0.03 mg/L in 2001 to 0.12 mg/L in 2019 (Figure 3b). While these values  
191 remained below the breakpoint for reduced susceptibility (1.0 mg/L as per CLSI standards, red  
192 dashed line in Figure 3b), they represent a four-fold increase. A similar fourfold increase was  
193 observed in the ceftriaxone MIC<sub>50</sub> during this period.

194

195 Azithromycin resistance in *Salmonella* Typhi was first identified in 2013 during our study period  
196 (Figure 2c). Subsequently, an average of 2% (1%–3%; 95% CI) of *Salmonella* Typhi isolates per  
197 year displayed resistance to azithromycin. An in-depth analysis using local polynomial  
198 regression to examine the yearly percentage of azithromycin-resistant isolates did not show a  
199 substantial increase in azithromycin resistance since its initial identification in 2013 (no data  
200 shown).

201

## 202 Correlation between AMR and antimicrobial consumption

203 To gain deeper insights, we compared AMR data for cotrimoxazole, ciprofloxacin, and  
204 azithromycin with national antimicrobial consumption data (Figure 4). Cotrimoxazole  
205 consumption exhibited a notable decline, from 0.8 defined daily doses (DDD) per 1,000 persons  
206 per day in 1999 to 0.1 DDD/1,000 persons/day in 2020 (Figure 4a). Concurrently, resistance to

207 cotrimoxazole showed a decreasing trend during this period (Figure 1c and 4a). Also, it showed  
208 significant correlation with consumption patterns ( $r = 0.77$ ;  $p = 0.00$  at a 95% confidence  
209 interval, CI).

210 Ciprofloxacin consumption remained consistent throughout the study period, between 1.1 and  
211 1.6 DDD/1,000 persons/day (Figure 4b). Non-susceptibility to ciprofloxacin showed a stable  
212 pattern as well, but no significant correlation with consumption was identified ( $r = 0.21$ ;  $p = 0.38$   
213 at a 95% CI). On the other hand, azithromycin consumption increased by 38-fold during study  
214 years, 1999-2020, from 0.1 DDD/1,000 persons/day to 3.8 DDD/1,000 persons/day. The average  
215 annual increase in azithromycin consumption was 0.18 DDD/1,000 persons/day (0.07–0.29 at a  
216 95% CI) (Figure 4c).

217

## 218 **Discussion**

219 This study provides a comprehensive analysis of 12,435 cases of typhoid fever cases spanning 24  
220 years in Bangladesh, shedding light on AMR patterns of the disease. In endemic countries like  
221 Bangladesh, typhoid fever is largely treated in the community settings while the hospitals deal  
222 complicated cases. This unique care-seeking behavior made it challenging to estimate the true  
223 typhoid burden and extent of AMR.<sup>10, 11</sup> In addition, hospital-based surveillance from  
224 Bangladesh reported higher proportion of MDR typhoid cases than community settings,<sup>10</sup>  
225 potentially not reflecting the true scenario. To bridge this gap, we established a typhoid  
226 surveillance system in Dhaka, Bangladesh, covering both hospital and community sites.<sup>5, 8, 32, 33</sup>  
227 Popular Diagnostic Center (PDC), the community-based site and OPD of the two study hospitals  
228 contributed 72% (8,957/12,435) of the cases in our study.

229

230 We analyzed the dataset to observe trends in AMR among *Salmonella* Typhi isolates over time.  
231 Notably, there were declining resistance patterns for first-line antimicrobials, including  
232 amoxicillin, chloramphenicol, and cotrimoxazole (Figure 1a–c). This decline was associated with  
233 a decrease in multidrug-resistant (MDR) typhoid cases (Figure 1d). Since 2017, over 80% of  
234 *Salmonella* Typhi isolates have remained susceptible to first-line drugs, with the average MDR  
235 rate during 2017–2022 being 17% (15%–19%, 95% CI). Similar reductions in MDR have been  
236 documented in enteric fever surveillances across various countries, including India, Vietnam,  
237 Laos, Indonesia, Nepal, and Pakistan (pre-2016 XDR outbreak).<sup>34-41</sup> The Global Typhoid  
238 Genomics Consortium's report further supports decreasing MDR trends in several typhoid-  
239 endemic countries including Bangladesh, India, Nepal, Indonesia, and the Philippines.<sup>42</sup>  
240 Additionally, our data revealed a decreasing trend in cotrimoxazole consumption, a key first-line  
241 antimicrobial in Bangladesh (Figure 4a). It aligned with declining resistance to cotrimoxazole  
242 over time and demonstrated a significant correlation ( $r = 0.77$ ;  $p = 0.00$  at 95% CI; Figure 1c and  
243 4a). Further investigation is needed to understand the intricate relationship between drug  
244 consumption and resistance.

245

246 Ciprofloxacin non-susceptibility and consumption, on the other hand, remained unchanged  
247 (Figure 2a and 4b). The ciprofloxacin MIC also revealed continuing non-susceptibility (Figure  
248 3a), indicating its ongoing ineffectiveness for treating typhoid in Bangladesh. The current  
249 empirical typhoid treatment in the country is either ceftriaxone or oral azithromycin. Only two  
250 ceftriaxone-resistant *Salmonella* Typhi isolates were identified in our study (in 1999 and 2000).  
251 However, there was a gradual increase in ceftriaxone MIC from 0.03 to 0.12 mg/L over 20 years

252 (1999-2019; Figure 3b). Although still below the non-susceptibility breakpoint (1.0 mg/L as per  
253 the CLSI<sup>43</sup>), the ceftriaxone MIC may approach reduced susceptibility in the near future.

254

255 Azithromycin resistance in *Salmonella* Typhi was first identified in our study in 2013, but  
256 remained sporadic with only 1% isolates in 2022 (Figure 2c). The consumption of the drug, on  
257 the other hand increased by ~40-fold during 1999-2020 (Figure 4c). High azithromycin use may  
258 exert selection pressure, potentially fostering both macrolide- and non-macrolide resistance  
259 determinants in the gut.<sup>44</sup> The underlying molecular cause of azithromycin resistance in  
260 *Salmonella* Typhi is a single-point mutation in the AcrB efflux pump gene, *acrB-717*, reported  
261 globally.<sup>16, 42, 45</sup> This mutation also independently emerged in diverse *Salmonella* Typhi  
262 genotypes.<sup>45</sup> Statistical modeling of a random *Salmonella* Typhi genome dataset from  
263 Bangladesh suggests a rising effective population size of azithromycin-resistant isolates.<sup>46</sup> Our  
264 study findings do not demonstrate a similar trend (Figure 4c).

265

266 The introduction of the typhoid conjugate vaccine (TCV) in Bangladesh has the potential to  
267 markedly reduce typhoid burden, including drug-resistant cases. Once introduced, the expected  
268 decreasing trend in the post-TCV period will facilitate the focused effort on effective  
269 antimicrobial stewardship strategies for Bangladesh. Previous studies showed that for each  
270 culture-confirmed typhoid case, at least three patients receive antibiotics in Bangladesh.<sup>47</sup> The  
271 TCV, with its decreasing trend, could significantly cut the antibiotic consumption in the country  
272 which is historically high, even increasing according to our results (Figure 4b and 4c).

273

274 Before MDR typhoid spread across the globe, the first-line antimicrobials were widely used to  
275 treat typhoid. These low-cost antimicrobial agents are well-tolerated and saved millions of lives  
276 from typhoid fever for decades (1950s–1980s).<sup>48-50</sup> Even countries without MDR cases, like  
277 Samoa island, continue using amoxicillin as the primary typhoid treatment,<sup>51, 52</sup> emphasizing the  
278 efficacy of these low-cost agents. The successful use of cotrimoxazole to treat typhoid in recent  
279 times, has also been reported.<sup>53</sup> All three first-line drugs have been listed as essential drugs by  
280 the Government of Bangladesh since 1982, preventing pharmaceutical price hikes.<sup>54</sup> Unlike the  
281 lengthy and expensive development of new antimicrobials, reintroducing these first-line drugs  
282 for treating typhoid cases, requires no research investment. Instead, such step will provide a  
283 crucial window for developing new classes of antimicrobial drugs, a process hindered by  
284 significant investment barriers in the last decade.<sup>55</sup>

285

286 However, reintroducing older drugs may raise concerns about the return of MDR with increased  
287 use. The initial H58 *Salmonella* Typhi isolates in the 1990s carried MDR genes on an IncHI1  
288 plasmid. Recent H58 *Salmonella* Typhi isolates in Bangladesh and other endemic countries have  
289 integrated these MDR genes into a chromosomal island. This integration helps avoid plasmid-  
290 imposed fitness costs, which are negative impacts on bacterial reproduction and survival due to  
291 plasmid carriage.<sup>46, 56, 57</sup> Due to these genomic changes, the re-emergence of MDR would require  
292 this H58 lineage to become almost extinct (or at least <5%) before reconsideration. Continuous  
293 clinical, laboratory, and genomic surveillance during post-TCV introduction is essential to secure  
294 a safe window for the use of the first-line of antimicrobials.<sup>42</sup> Monitoring antimicrobial use and  
295 resistance remains crucial for successfully treating typhoid and other infections effectively.

296

297 The results of our study should be considered within the context of several limitations. First, the  
298 two hospitals participating in the surveillance were among the largest pediatric reference  
299 hospitals in Bangladesh, resulting in a bias towards younger patients. Second, all study sites were  
300 in Dhaka, which may not represent other parts of Bangladesh. However, our data reflect the high  
301 typhoid burden in the Dhaka city with a reported 57% seropositivity for typhoid fever.<sup>6</sup> Third,  
302 many typhoid patients in Bangladesh are empirically treated without blood culture confirmation.  
303 No community-based enteric fever surveillance account for this, limiting comparisons. Finally,  
304 national antibiotic consumption data from IQVIA-MIDAS® database were used in this study, as  
305 regional or disease-specific data were unavailable.

306

307 Taken together, our study describes the trends in antimicrobial resistance (AMR) amongst  
308 *Salmonella* Typhi isolates in Bangladesh over the last two decades, correlating them with  
309 antibiotic consumption. We proposed a potential antibiotic stewardship strategy, reintroducing  
310 first-line antimicrobials for treating typhoid fever. Given their >80% susceptibility for all  
311 *Salmonella* Typhi isolates since 2017, this strategy could offer a viable empirical treatment  
312 option. Our analysis could serve as a crucial baseline for monitoring the impact of future  
313 interventions, including the TCV and improvements in water, sanitation, and hygiene (WASH),  
314 on typhoid burden and AMR in the country. The upcoming years are pivotal in combatting  
315 typhoid fever, and our study will be instrumental in measuring the effectiveness of interventions  
316 aimed at reducing the burden and AMR of this often-neglected tropical disease.

317



## 318 **Acknowledgment**

319 We would like to thank all past and present members of the clinical microbiology and  
320 epidemiology team of the Child Health Research Foundation.

321

## 322 **Funding statement**

323 The work presented here was supported by Gavi, the Vaccine Alliance, through the World  
324 Health Organization-supported Invasive Bacterial Vaccine Preventable Diseases study (grant  
325 numbers 201588766, 201233523, 201022732, 200749550), by leveraging the Pneumococcal  
326 Vaccines Accelerated Development and Introduction Plan (PneumoADIP), by the Bill and  
327 Melinda Gates Foundation through SEAP (grant number INV-008335), and by the Child Health  
328 Research Foundation (CHRF).

329

## 330 **Ethics statement**

331 All study protocols received approval from the Ethics Review Committees (ERC) of Bangladesh  
332 Shishu Hospital and Institute (BSHI). Informed written consent and clinical information were  
333 obtained from parents/legal guardians for hospitalized cases. For out-patient cases, no formal  
334 consent was obtained as blood samples were collected as part of routine clinical care at the  
335 discretion of the treating physician and data from routine clinical care were retrospectively  
336 included without identifiable information.

337

## 338 **Transparency declarations**

339 All authors declare no conflict of interest.

340

### 341 **Data Availability Statement**

342 All relevant study data are provided in the Supplementary Data S1 of the article.

343

### 344 **References**

- 345 1. Murray CJL, Ikuta KS, Sharara F et al. Global burden of bacterial antimicrobial resistance in  
346 2019: a systematic analysis. *The Lancet* 2022; **399**: 629-55.
- 347 2. Atkins KE, Flasche S. Vaccination to reduce antimicrobial resistance. *The Lancet Global*  
348 *Health* 2018; **6**: e252.
- 349 3. Baker RE, Mahmud AS, Miller IF et al. Infectious disease in an era of global change. *Nature*  
350 *Reviews Microbiology* 2021.
- 351 4. Stanaway JD, Reiner RC, Blacker BF et al. The global burden of typhoid and paratyphoid  
352 fevers: a systematic analysis for the Global Burden of Disease Study 2017. *The Lancet Infectious*  
353 *Diseases* 2019.
- 354 5. Garrett DO, Longley AT, Aiemjoy K et al. Incidence of typhoid and paratyphoid fever in  
355 Bangladesh, Nepal, and Pakistan: results of the Surveillance for Enteric Fever in Asia Project.  
356 *The Lancet Global Health* 2022; **10**: e978-e88.
- 357 6. Aiemjoy K, Seidman JC, Saha S et al. Estimating typhoid incidence from community-based  
358 serosurveys: a multicohort study. *The Lancet Microbe* 2022.
- 359 7. Saha SK, Baqui AH, Hanif M et al. Typhoid fever in Bangladesh: implications for vaccination  
360 policy. *The Pediatric infectious disease journal* 2001; **20**: 521-4.
- 361 8. Saha S, Islam M, Saha S et al. Designing Comprehensive Public Health Surveillance for  
362 Enteric Fever in Endemic Countries: Importance of Including Different Healthcare Facilities.  
363 *The Journal of Infectious Diseases* 2018; **218**: S227-S31.
- 364 9. Marchello CS, Birkhold M, Crump JA. Complications and mortality of typhoid fever: A  
365 global systematic review and meta-analysis. *Journal of Infection* 2020; **81**: 902-10.

- 366 10. Saha S, Saha S, Ruhulamin M et al. Decreasing trend of multiresistant *Salmonella* typhi in  
367 Bangladesh. *The Journal of antimicrobial chemotherapy* 1997; **39**: 554-6.
- 368 11. Saha SK, Saha SK. Antibiotic resistance of *Salmonella* typhi in Bangladesh. *Journal of*  
369 *Antimicrobial Chemotherapy* 1994; **33**: 190-1.
- 370 12. Olarte J, Galindo E. *Salmonella* typhi resistant to Chloramphenicol, Ampicillin, and Other  
371 Antimicrobial Agents: Strains Isolated During an Extensive Typhoid Fever Epidemic in Mexico.  
372 *Antimicrobial Agents and Chemotherapy* 1973; **4**: 597-601.
- 373 13. Saha SK, Tabassum N, Saha S. Typhoid Conjugate Vaccine: An Urgent Tool to Combat  
374 Typhoid and Tackle Antimicrobial Resistance. *The Journal of Infectious Diseases* 2021; **224**:  
375 S788-S91.
- 376 14. Andrews JR, Qamar FN, Charles RC et al. Extensively Drug-Resistant Typhoid — Are  
377 Conjugate Vaccines Arriving Just in Time? *New England Journal of Medicine* 2018; **379**: 1493-  
378 5.
- 379 15. Djeghout B, Saha S, Sajib MSI et al. Ceftriaxone-resistant *Salmonella* Typhi carries an IncI1-  
380 ST31 plasmid encoding CTX-M-15. *Journal of medical microbiology* 2018; **67**: 620-7.
- 381 16. Hooda Y, Sajib MS, Rahman H et al. Molecular mechanism of azithromycin resistance  
382 among typhoidal *Salmonella* strains in Bangladesh identified through passive pediatric  
383 surveillance. *PLoS neglected tropical diseases* 2019; **13**.
- 384 17. Jacob JJ, Pragasam AK, Vasudevan K et al. *Salmonella* Typhi acquires diverse plasmids  
385 from other Enterobacteriaceae to develop cephalosporin resistance. *Genomics* 2021; **113**: 2171-6.
- 386 18. Sah R, Donovan S, Seth-Smith HMB et al. A novel lineage of ceftriaxone-resistant  
387 *Salmonella* Typhi from India that is closely related to XDR S. Typhi found in Pakistan. *Clinical*  
388 *Infectious Diseases* 2019.
- 389 19. Klemm EJ, Shakoor S, Page AJ et al. Emergence of an Extensively Drug-Resistant  
390 *Salmonella enterica* Serovar Typhi Clone Harboring a Promiscuous Plasmid Encoding  
391 Resistance to Fluoroquinolones and Third-Generation Cephalosporins. *mBio* 2018; **9**: e00105-18.
- 392 20. Wong W, Rawahi HA, Patel S et al. The first Canadian pediatric case of extensively drug-  
393 resistant *Salmonella* Typhi originating from an outbreak in Pakistan and its implication for  
394 empiric antimicrobial choices. *IDCases* 2019; **15**: e00492.
- 395 21. Nizamuddin S, Khan EA, Chattaway MA et al. Case of Carbapenem-Resistant *Salmonella*  
396 Typhi Infection, Pakistan, 2022. *Emerging infectious diseases* 2023; **29**: 2395-7.

- 397 22. Levine MM, Simon R. The Gathering Storm: Is Untreatable Typhoid Fever on the Way?  
398 *mBio* 2018; **9**: e00482-18.
- 399 23. Birkhold M, Mwisongo A, Pollard AJ et al. Typhoid Conjugate Vaccines: Advancing the  
400 Research and Public Health Agendas. *The Journal of Infectious Diseases* 2021; **224**: S781-S7.  
401 24. Carey ME, McCann NS, Gibani MM. Typhoid fever control in the 21st century: where are  
402 we now? *Current Opinion in Infectious Diseases* 2022; **35**: 424-30.
- 403 25. Saha S, Saha SK. Invasive Bacterial Vaccine-Preventable Disease Surveillance: Successes  
404 and Lessons Learned in Bangladesh for a Sustainable Path Forward. *The Journal of Infectious*  
405 *Diseases* 2021; **224**: S293-S8.
- 406 26. Sajib MSI, Tanmoy AM, Hooda Y et al. Trends in antimicrobial resistance amongst  
407 *Salmonella* Paratyphi A isolates in Bangladesh: 1999–2021. *PLOS Neglected Tropical Diseases*  
408 2023; **17**: e0011723.
- 409 27. Saha SK, Naheed A, El Arifeen S et al. Surveillance for Invasive *Streptococcus pneumoniae*  
410 Disease among Hospitalized Children in Bangladesh: Antimicrobial Susceptibility and Serotype  
411 Distribution. *Clinical Infectious Diseases* 2009; **48**: S75-S81.
- 412 28. Tanmoy AM, Westeel E, De Bruyne K et al. *Salmonella enterica* serovar Typhi in  
413 Bangladesh: Exploration of Genomic Diversity and Antimicrobial Resistance. *mBio* 2018; **9**.
- 414 29. Andrews JM. Determination of minimum inhibitory concentrations. *Journal of Antimicrobial*  
415 *Chemotherapy* 2001; **48**: 5-16.
- 416 30. WHO. GLASS manual on the management of antimicrobial consumption data. 2020.
- 417 31. UN. World Population Prospect Report 2019. *World Population Prospects: Population*  
418 *Division, Department of Economic and Social Affairs, United Nations, 2019.*
- 419 32. Saha S, Islam M, Uddin MJ et al. Integration of enteric fever surveillance into the WHO-  
420 coordinated Invasive Bacterial-Vaccine Preventable Diseases (IB-VPD) platform: A low cost  
421 approach to track an increasingly important disease. *PLoS neglected tropical diseases* 2017; **11**.
- 422 33. Saha S, Islam MS, Sajib MSI et al. Epidemiology of Typhoid and Paratyphoid: Implications  
423 for Vaccine Policy. *Clinical Infectious Diseases* 2019; **68**: S117-S23.
- 424 34. Balaji V, Kapil A, Shastri J et al. Longitudinal Typhoid Fever Trends in India from 2000 to  
425 2015. *Am J Trop Med Hyg* 2018; **99**: 34-40.
- 426 35. Nga TVT, Duy PT, Lan NPH et al. The control of typhoid fever in Vietnam. *Am J Trop Med*  
427 *Hyg* 2018; **99**: 72.

- 428 36. Roberts T, Rattanavong S, Phommason K et al. Typhoid in Laos: an 18-year perspective.  
429 *Am J Trop Med Hyg* 2020; **102**: 749.
- 430 37. Lugito NPH. Antimicrobial resistance of *Salmonella enterica* serovars Typhi and Paratyphi  
431 isolates from a general hospital in Karawaci, Tangerang, Indonesia: A five-year review.  
432 *International Journal of Microbiology* 2017; **2017**.
- 433 38. Jamilah J, Hatta M, Natzir R et al. Analysis of existence of multidrug-resistant H58 gene in  
434 *Salmonella enterica* serovar Typhi isolated from typhoid fever patients in Makassar, Indonesia.  
435 *New Microbes and New Infections* 2020; **38**: 100793.
- 436 39. Shrestha KL, Pant ND, Bhandari R et al. Re-emergence of the susceptibility of the  
437 *Salmonella spp.* isolated from blood samples to conventional first line antibiotics. *Antimicrobial*  
438 *Resistance & Infection Control* 2016; **5**: 22.
- 439 40. Khadka S, Shrestha B, Pokhrel A et al. Antimicrobial Resistance in *Salmonella* Typhi  
440 Isolated From a Referral Hospital of Kathmandu, Nepal. *Microbiology Insights* 2021; **14**:  
441 11786361211056350.
- 442 41. Qamar FN, Yousafzai MT, Sultana S et al. A Retrospective Study of Laboratory-Based  
443 Enteric Fever Surveillance, Pakistan, 2012–2014. *The Journal of Infectious Diseases* 2018; **218**:  
444 S201-S5.
- 445 42. Carey ME, Dyson ZA, Ingle DJ et al. Global diversity and antimicrobial resistance of  
446 typhoid fever pathogens: Insights from a meta-analysis of 13,000 *Salmonella* Typhi genomes.  
447 *eLife* 2023; **12**: e85867.
- 448 43. CLSI. Performance Standards for Antimicrobial Susceptibility Testing. 30th ed. CLSI  
449 supplement M100. Wayne, PA: Clinical and Laboratory Standards Institute, 2020.
- 450 44. Doan T, Worden L, Hinterwirth A et al. Macrolide and Nonmacrolide Resistance with Mass  
451 Azithromycin Distribution. *New England Journal of Medicine* 2020; **383**: 1941-50.
- 452 45. Sajib MSI, Tanmoy AM, Hooda Y et al. Tracking the Emergence of Azithromycin  
453 Resistance in Multiple Genotypes of Typhoidal *Salmonella*. *mBio* 2021; **12**: e03481-20.
- 454 46. da Silva KE, Tanmoy AM, Pragasam AK et al. The international and intercontinental spread  
455 and expansion of antimicrobial-resistant *Salmonella* Typhi: a genomic epidemiology study. *The*  
456 *Lancet Microbe* 2022.
- 457 47. Andrews JR, Baker S, Marks F et al. Typhoid conjugate vaccines: a new tool in the fight  
458 against antimicrobial resistance. *The Lancet Infectious Diseases* 2019; **19**: e26-e30.

- 459 48. Geddes AM, Murdoch JM. Ampicillin in the treatment of paratyphoid fever- a comparative  
460 trial. *Postgrad Med J* 1964; **40**: 81-3.
- 461 49. Uwaydah M, Shamma'a M. The Treatment of Typhoid Fever with Ampicillin. *Lancet* 1964:  
462 1242-4.
- 463 50. Gilman RH, Terminel M, Levine MM et al. Comparison of Trimethoprim-Sulfamethoxazole  
464 and Amoxicillin in Therapy of Chloramphenicol-Resistant and Chloramphenicol Sensitive  
465 Typhoid Fever. *Journal of Infectious Diseases* 1975; **132**: 630-6.
- 466 51. Sikorski MJ, Desai SN, Tupua S et al. Tenacious endemic typhoid fever in Samoa. *Clinical*  
467 *Infectious Diseases* 2020; **71**: S120-S6.
- 468 52. Tanmoy AM. *Salmonella enterica* Serovar Typhi on an Island: No H58, No Multidrug  
469 Resistance, but for How Long? *mBio* 2022; **13**: e02426-22.
- 470 53. Karki M, Pandit S, Baker S et al. Cotrimoxazole treats fluoroquinolone-resistant *Salmonella*  
471 typhi H58 infection. *Case Reports* 2016; **2016**: bcr2016217223.
- 472 54. Directorate of Drug Administration. Report of the Expert Committee for Drugs on The  
473 National Drug Policy of Bangladesh 1982. ed: Directorate of Drug Administration, Ministry of  
474 Health & Population Control, Government of the People's Republic of Bangladesh., 1986;  
475 page-7.
- 476 55. Wouters OJ, McKee M, Luyten J. Estimated research and development investment needed to  
477 bring a new medicine to market, 2009-2018. *Jama* 2020; **323**: 844-53.
- 478 56. Millan AS, MacLean RC. Fitness Costs of Plasmids: a Limit to Plasmid Transmission.  
479 *Microbiology Spectrum* 2017; **5**: 10.1128/microbiolspec.mtbp-0016-2017.
- 480 57. Lima NCB, Tanmoy AM, Westeel E et al. Analysis of isolates from Bangladesh highlights  
481 multiple ways to carry resistance genes in *Salmonella* Typhi. *BMC Genomics* 2019; **20**: 530.  
482  
483

## 484 **Figure legends**

485 **Figure 1.** Yearly trends in resistance (-R) and multidrug resistance (MDR) among *Salmonella*  
486 Typhi Cases (1999-2022, Bangladesh). (a) Amoxicillin Resistance, (b) Chloramphenicol  
487 Resistance, (c) Cotrimoxazole Resistance, and (d) MDR (defined as concurrent resistance to  
488 amoxicillin, chloramphenicol, and cotrimoxazole). Information on MDR is presented for all  
489 recorded cases.

490  
491 **Figure 2.** Yearly trends in *Salmonella* Typhi susceptibility for Ciprofloxacin, Ceftriaxone, and  
492 Azithromycin (1999-2022) in Bangladesh. (a) Ciprofloxacin Non-Susceptibility (NS), (b)  
493 Ceftriaxone Resistance (-R), and (c) Azithromycin Resistance (-R). Susceptibility data were  
494 present for 12,431, 12,414, and 8,187 cases respectively.

495  
496 **Figure 3.** Changes in minimum inhibitory concentrations (MIC) for (a) ciprofloxacin and (b)  
497 ceftriaxone among *Salmonella* Typhi cases from 1999 to 2022 in Bangladesh. The MICs were  
498 determined for a total of 3,214 and 3,518 isolates for ciprofloxacin (1999–2016) and ceftriaxone  
499 (1999–2019), respectively. The color of the dots represents resistant (red), intermediate (blue),  
500 and susceptible (green) isolates. The generalized additive model (GAM) lines depict the changes  
501 in the MICs (black line), with a 95% confidence interval (grey shades) over time.

502  
503 **Figure 4.** Patterns of antibiotic consumption and antimicrobial resistance in (a) Cotrimoxazole,  
504 (b) Ciprofloxacin, and (c) Azithromycin among *Salmonella* Typhi Cases in Bangladesh from  
505 1999 to 2020. Consumption data for ciprofloxacin was unavailable from 1999 to 2001.  
506 Resistance (-R) or Non-susceptibility (NS) to cotrimoxazole, ciprofloxacin, and azithromycin are



507 presented on the primary Y-axis. The secondary Y-axis displays antibiotic consumption,  
508 represented as the Defined Daily Dose (DDD) per 1,000 persons per day (DDD/1,000 day/year).

509

## 510 **Supplementary file legends**

511 **Figure S1.** Overview of the *Salmonella* Typhi database of 12,435 cases collected from 1999–  
512 2022 and MDR percentage in Bangladesh. Yearly hospitalized (IPD) and outpatient (OPD) case  
513 numbers (on the left y-axis) are presented by the year of isolation. The x-axis labels indicate the  
514 number of isolates collected each year. Percentages of MDR for IPD and OPD cases per year  
515 represented as lines on the right y-axis.

516

517 **Data S1.** Antimicrobial resistance dataset of 12,435 typhoid cases in Bangladesh from 1999 to  
518 2022 (S=Susceptible, I=Intermediate, and R=Resistant).

519



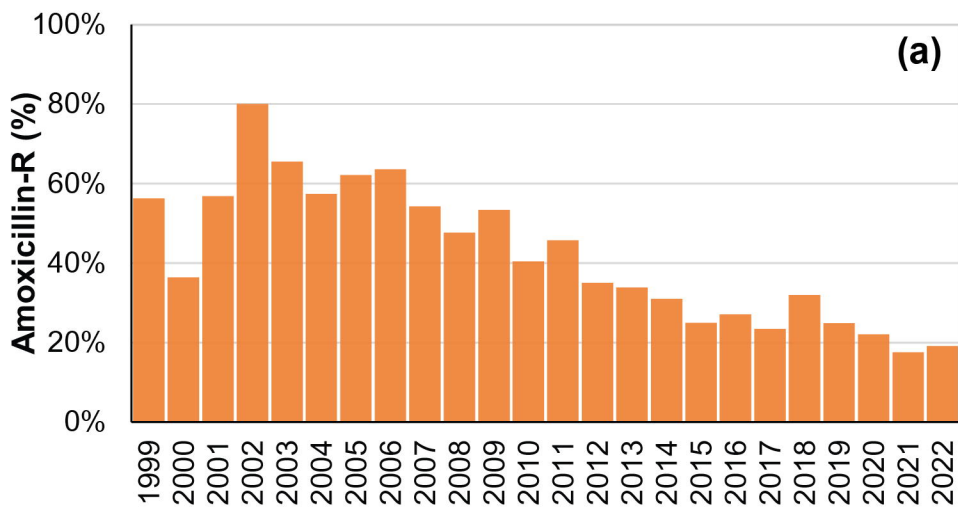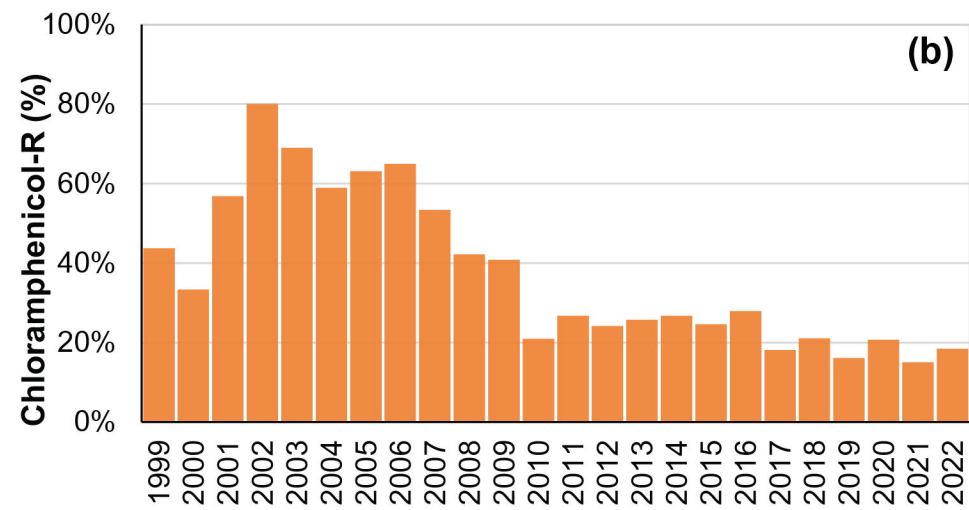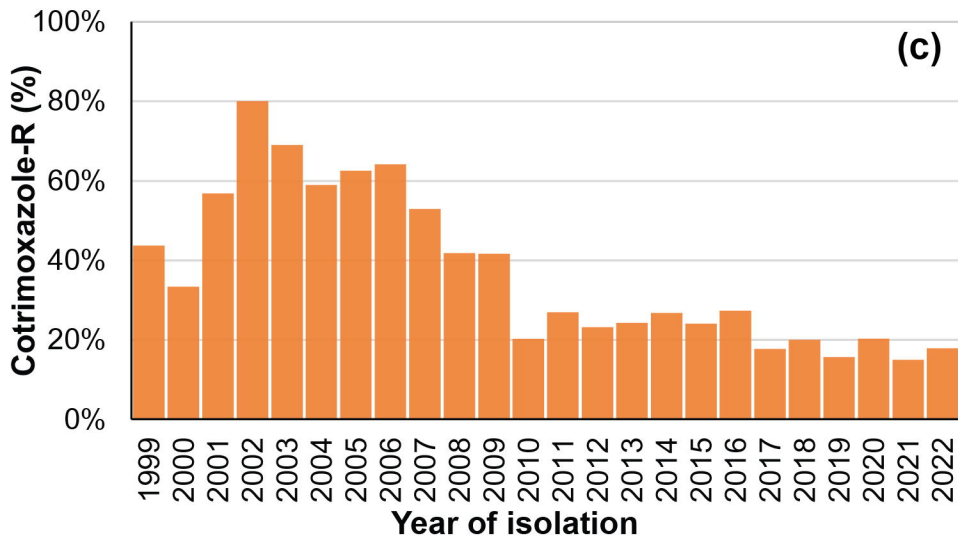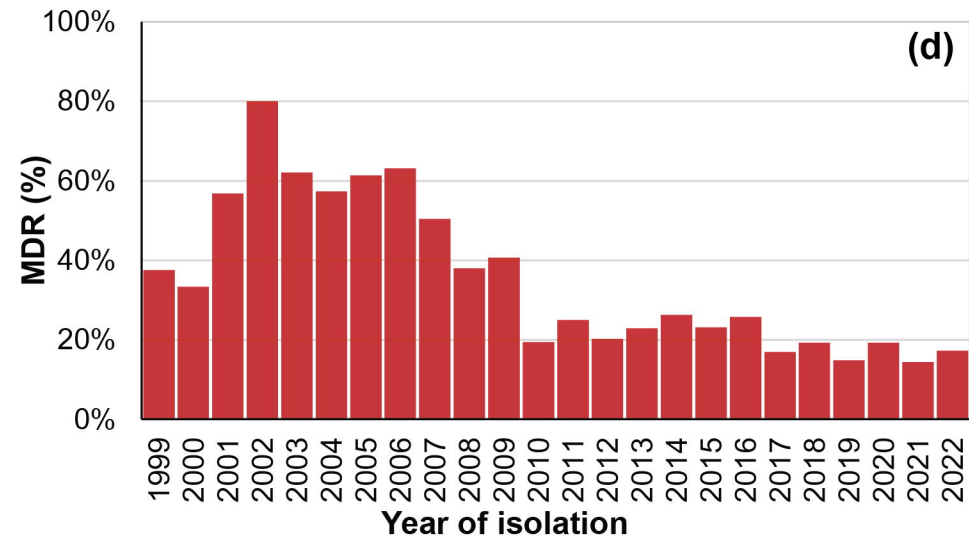

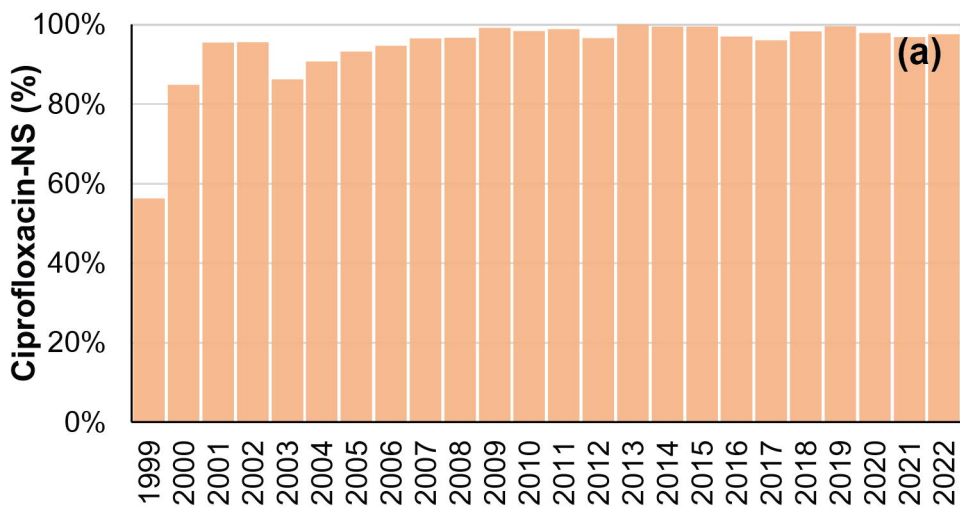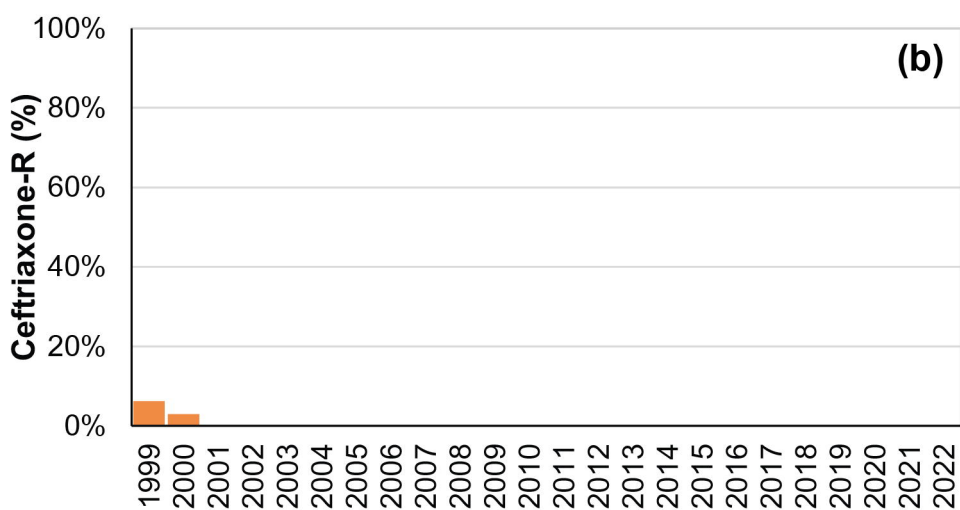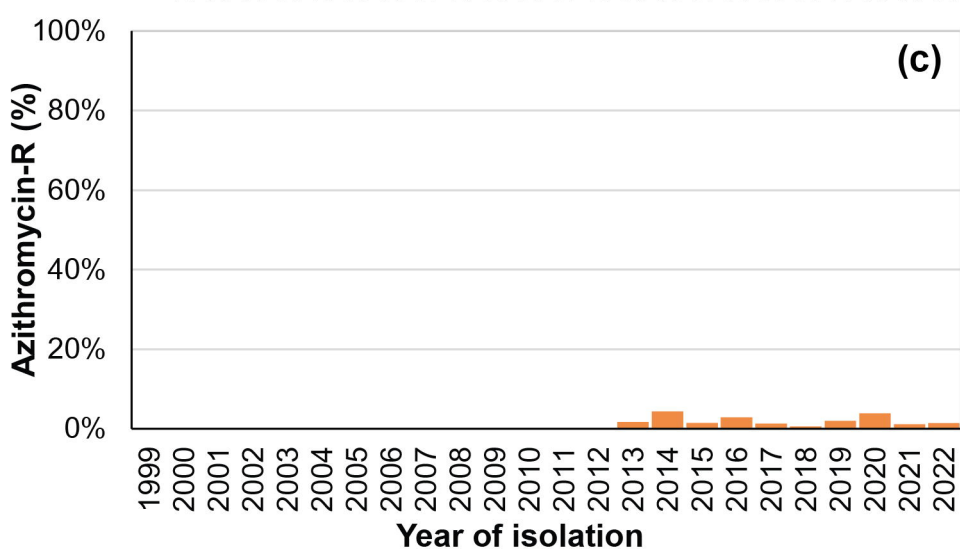

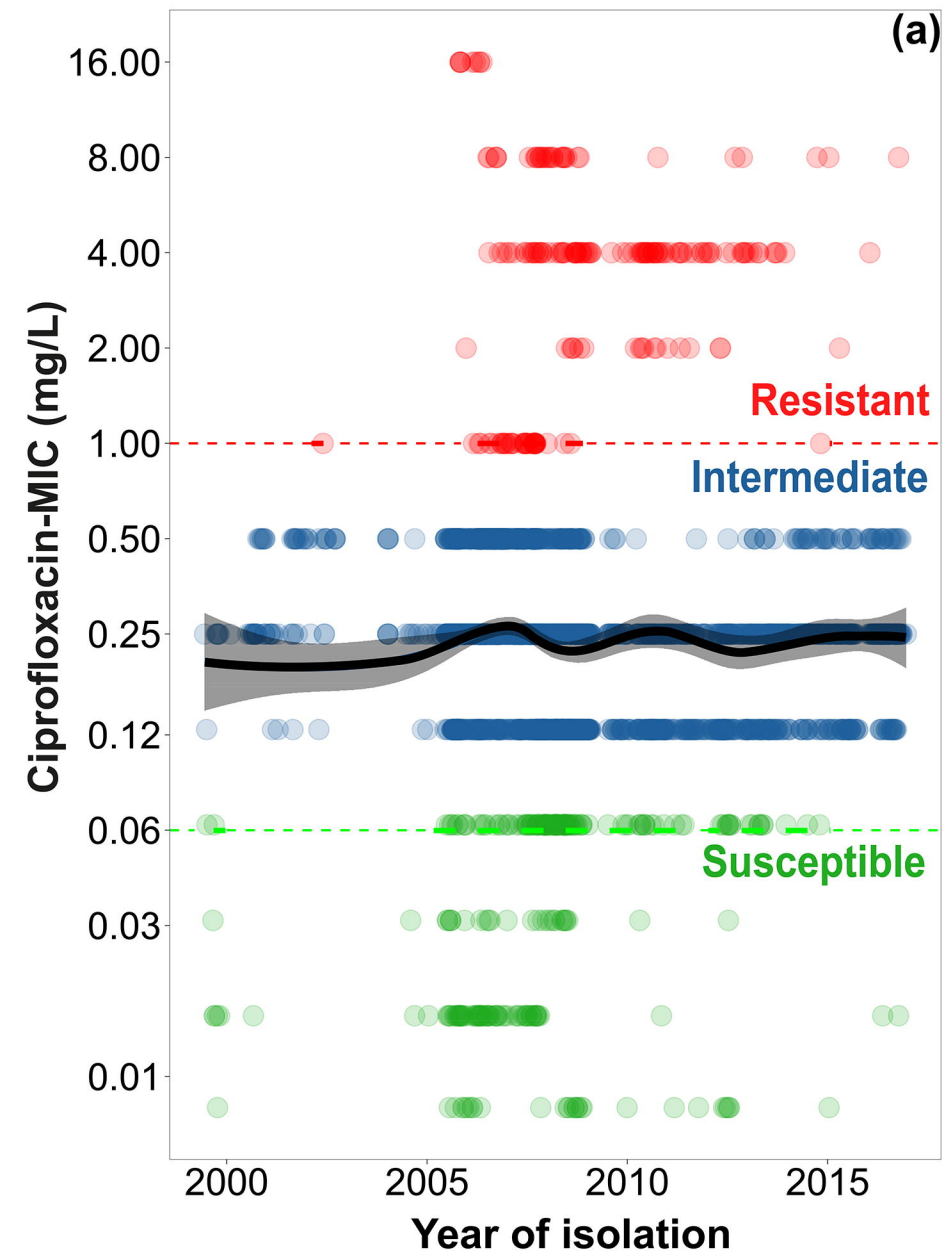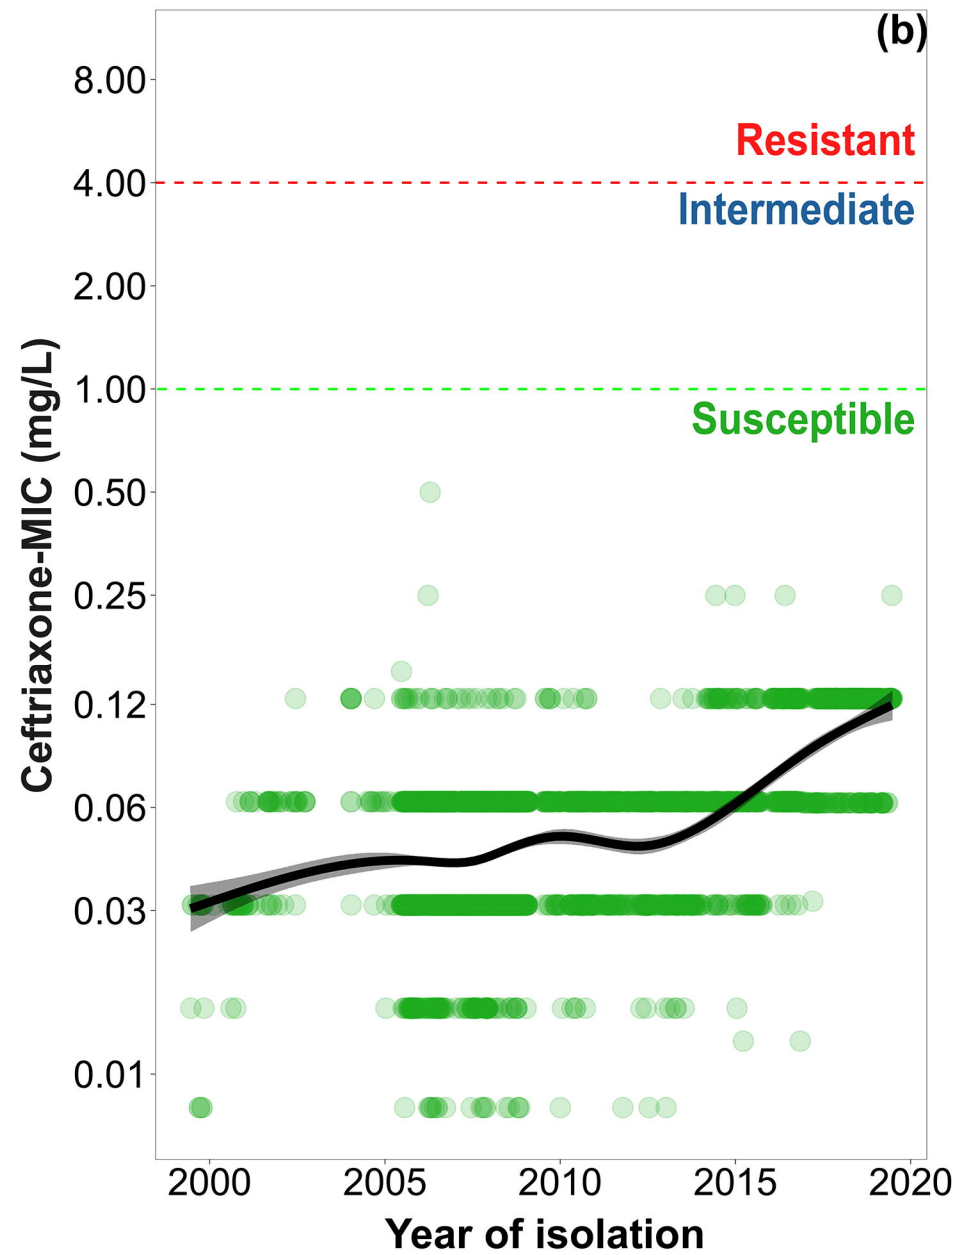

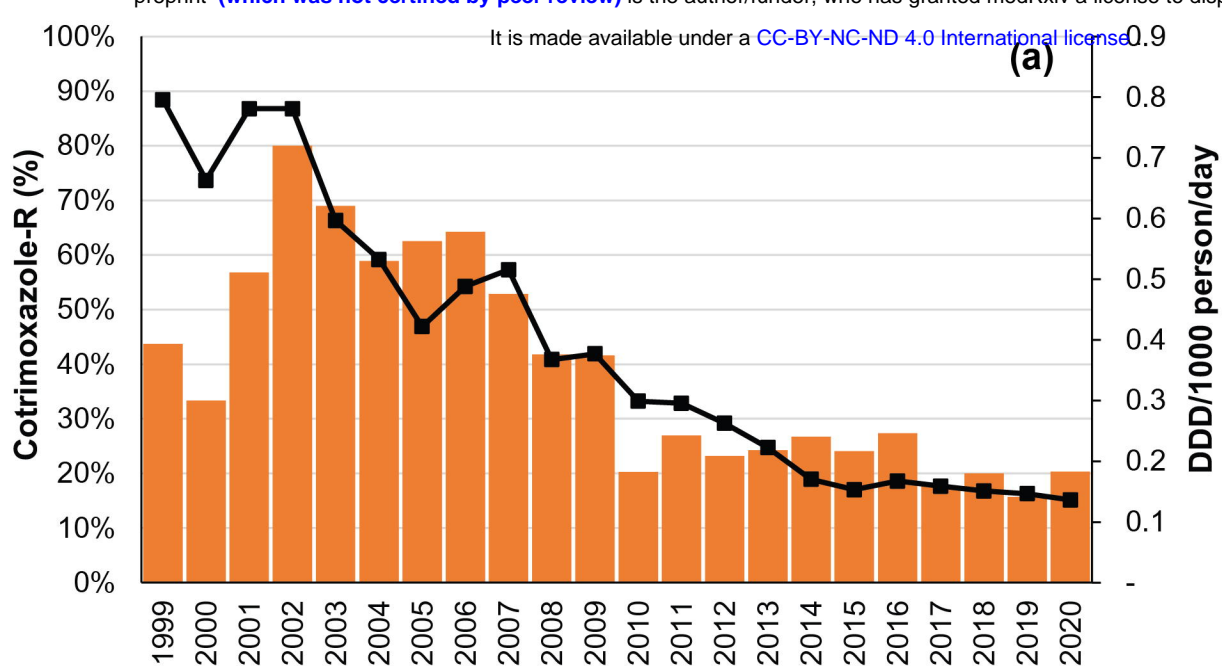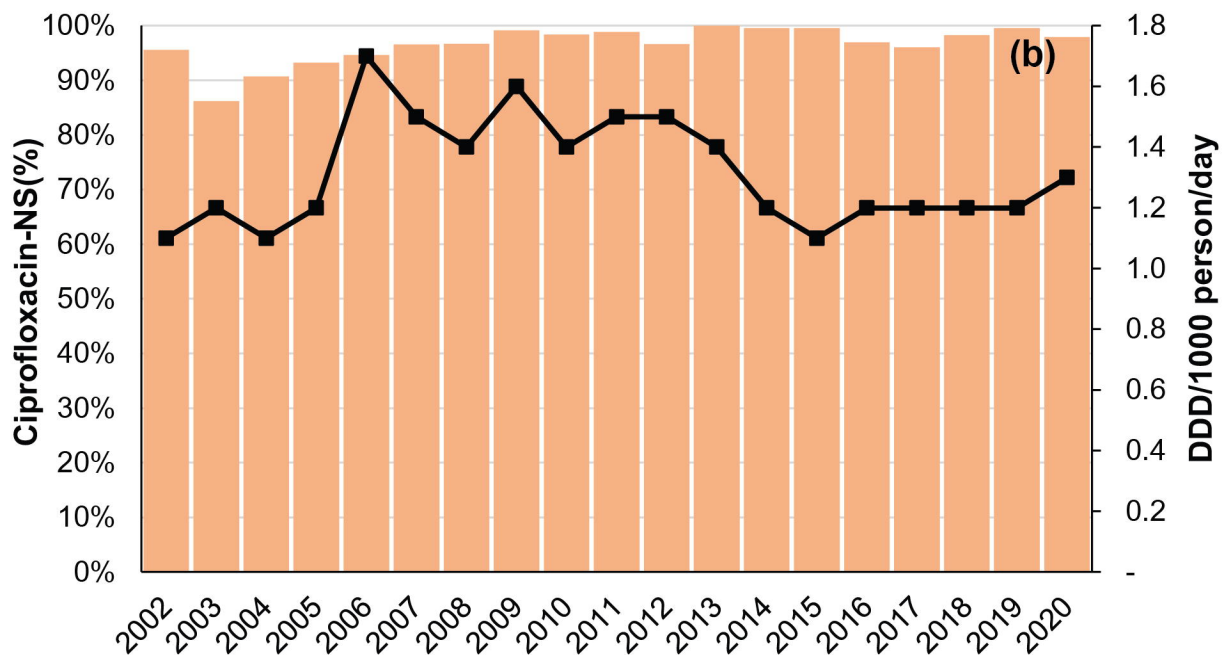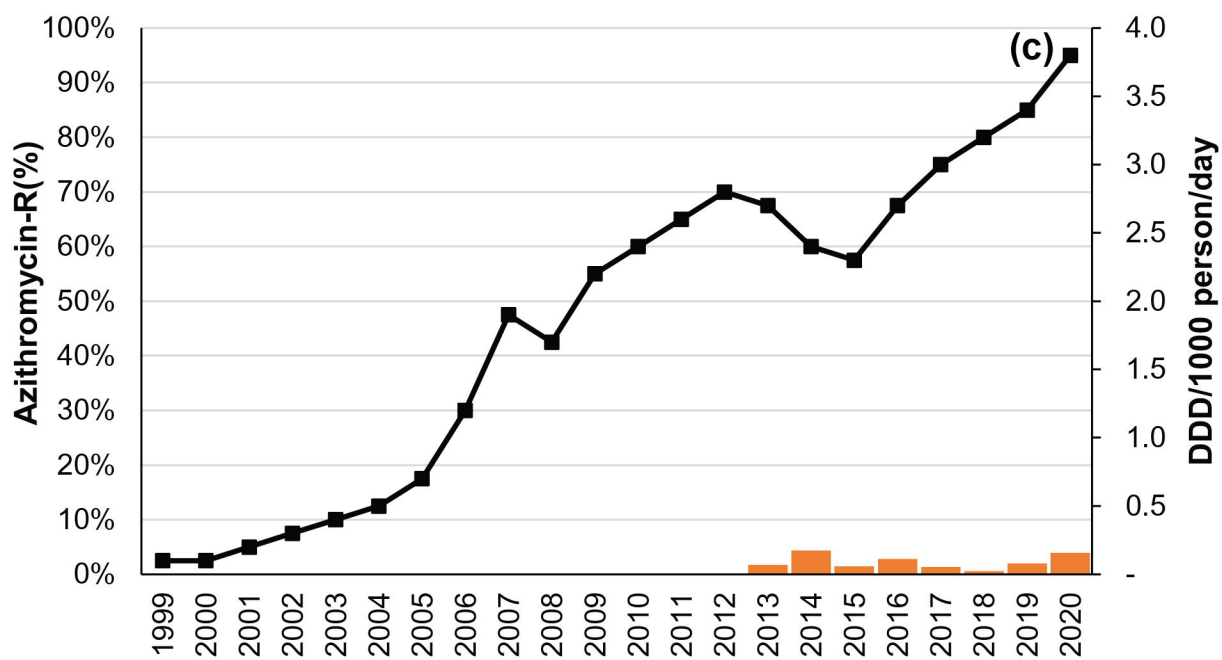

Source: https://www.medrxiv.org/content/10.1101/2023.12.21.23300147v1.full.pdf
